# Supplementary material for: Anthocyanins from Hibiscus syriacus L. Inhibit Melanogenesis by Activating the ERK Signaling Pathway
Source: PubMed Central journal article supplement (PMC6920888; doi:10.3390/biom9110645), 2019-10-24
Supplement: biomolecules-09-00645-s001.pdf [file biomolecules-09-00645-s001.pdf]

# Supplementary Materials: Anthocyanins from *Hibiscus syriacus* L. Inhibit Melanogenesis by Activating the ERK Signaling Pathway

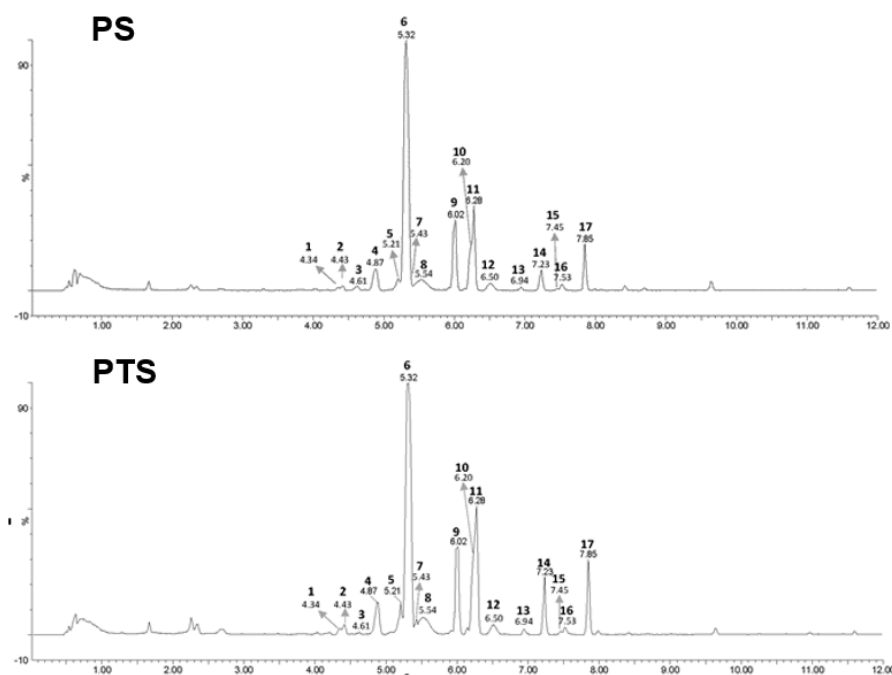

**Figure 1.** Comprehensive profile of anthocyanin and flavonoid constituents in PS and PTS was directly analyzed by UPLC-PDA-QToF-MS chromatogram.

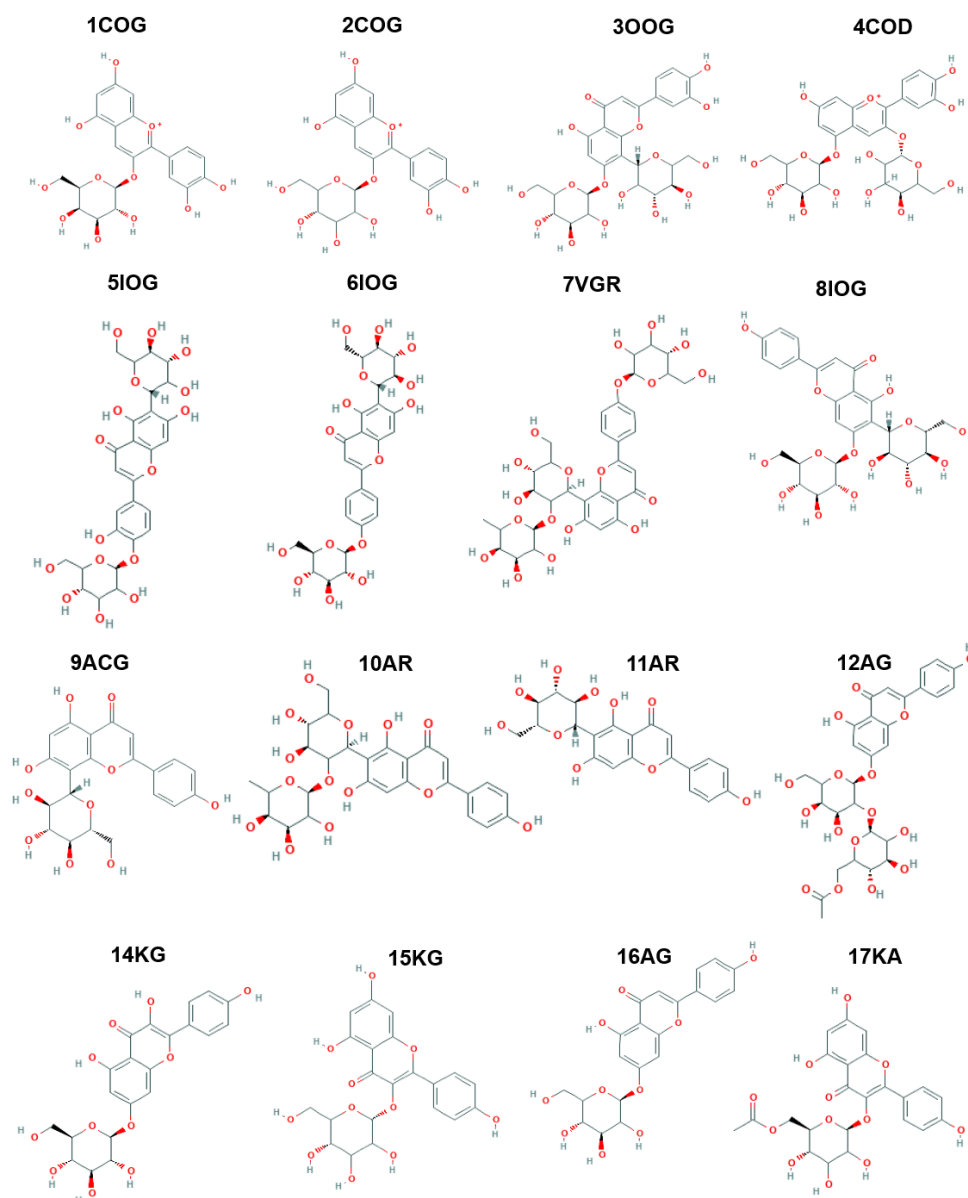

**Figure S2.** Structure of 17 flavonoid glycosides confirmed from *H. syriacus* in this study. 1COG, Cyanidin-3-*O*-galactoside; 2COG, Cyanidin-3-*O*-glucoside; 3OOG, Orientin-7-*O*-glucoside; 4COD, Cyanidin-3,5-*O*-diglucoside; 5IOG, Isoorientinm-4'-*O*-glucoside; 6IOG, Isovitexin-4'-*O*-glucoside; 7VGR, Vitexin-4'-*O*-glucoside-2''-*O*-rhamnoside; 8IOG, Isovitexin-7-*O*-glucoside (saponarin); 9ACG, Apigenin-8-C- $\beta$ -D-glucopyranoside (Vitexin); 10IR, Isovitexin-2''-*O*-rhamnoside; 11AG, Apigenin-6-C- $\beta$ -D-glucopyranoside (Isovitexin); 12AG, Apigenin-6-C-glucoside-7-(6''-*O*-acetyl)-glucoside; 13KG, Kaempferol-*O*-glucoside derivative (not found in PubChem); 14KG, Kaempferol-7-*O*-glucoside; 15KG, Kaempferol-3-*O*-glucoside; 16AG, Apigenin-7-*O*-glucoside; 17KA, Kaempferol-3-(6''-acetylglucoside).

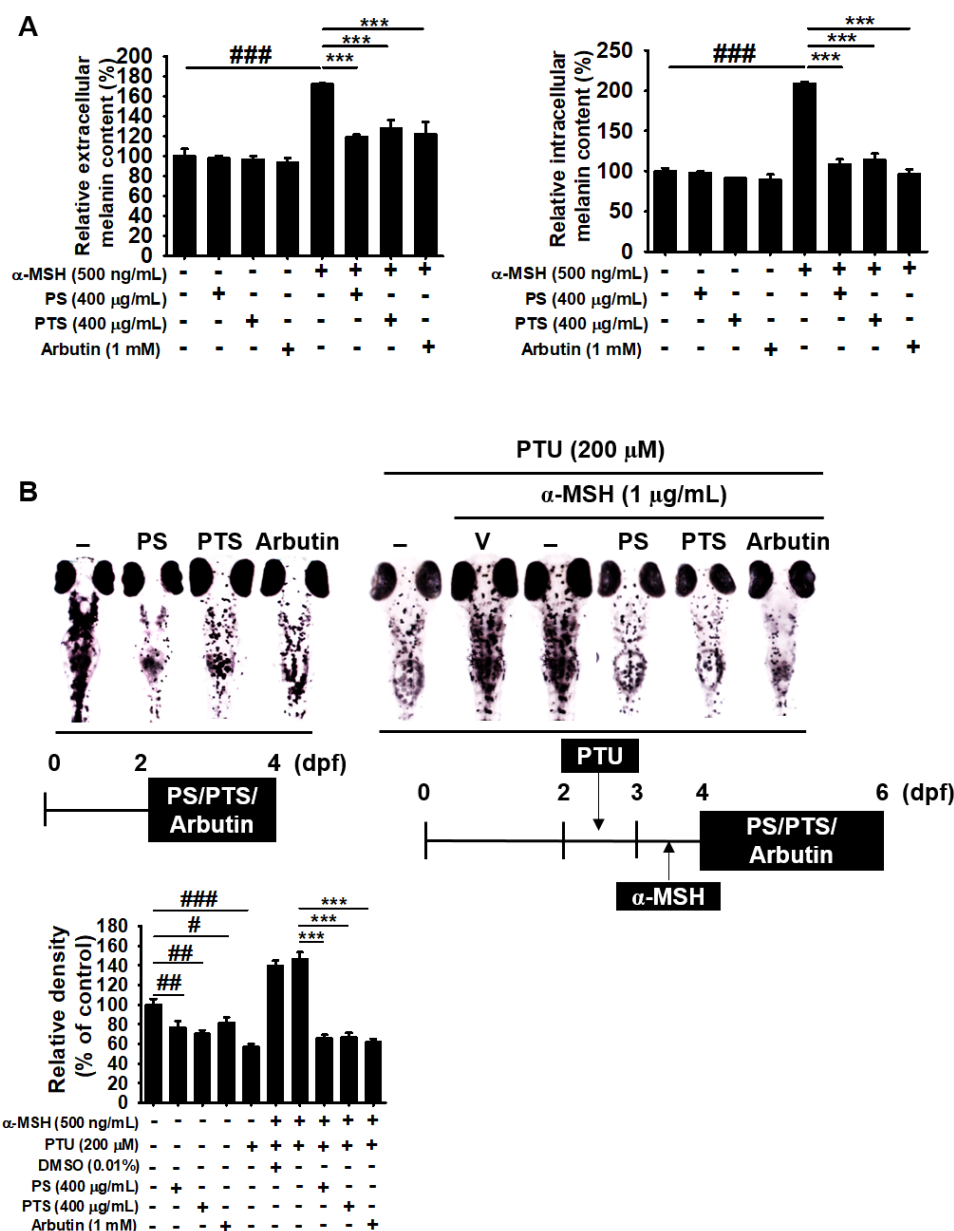

**Figure S3.** PS and PTS decrease melanogenesis in  $\alpha$ -MSH-stimulated B16F10 cells and inhibit the melanin synthesis in zebrafish larvae. (A) B16F10 cells were exposed to 500 ng/mL of  $\alpha$ -MSH in the presence of PS or PTS (400  $\mu$ g/mL) and 1 mM arbutin for 72 h, and extracellular (right panel) and intracellular (left panel) melanin contents were measured. (B). Zebrafish larvae at 2 dpf were treated with PS or PTS (400  $\mu$ g/mL) and arbutin (1 mM) for 48 h, and images were collected (left four zebrafish larvae). Additionally, 2 dpf zebrafish larvae were treated with PTU (200  $\mu$ M) for 24 h and  $\alpha$ -MSH (1  $\mu$ g/mL) was treated for another 24 h. Next, the larvae were treated with PS or PTS (400  $\mu$ g/mL) and arbutin (1 mM) for 48 h. The effect of PS, PTS, and arbutin on pigmentation in zebrafish larvae was observed

under a microscope (40×). Relative density was calculated by Image J software. The percentage values in each group are relative to those in untreated group. Data are reported as the mean  $\pm$ SE of three independent experiments performed ( $n = 3$ ).  $### p < 0.001$  vs. untreated group;  $*** p < 0.001$  vs.  $\alpha$ -MSH-stimulated group in B16F10 cells (A).  $\# p < 0.05$ ,  $## p < 0.01$ , and  $### p < 0.001$  vs. untreated control group;  $*** p < 0.001$  vs.  $\alpha$ -MSH-stimulated group pretreated with PTU in zebrafish larvae (B).

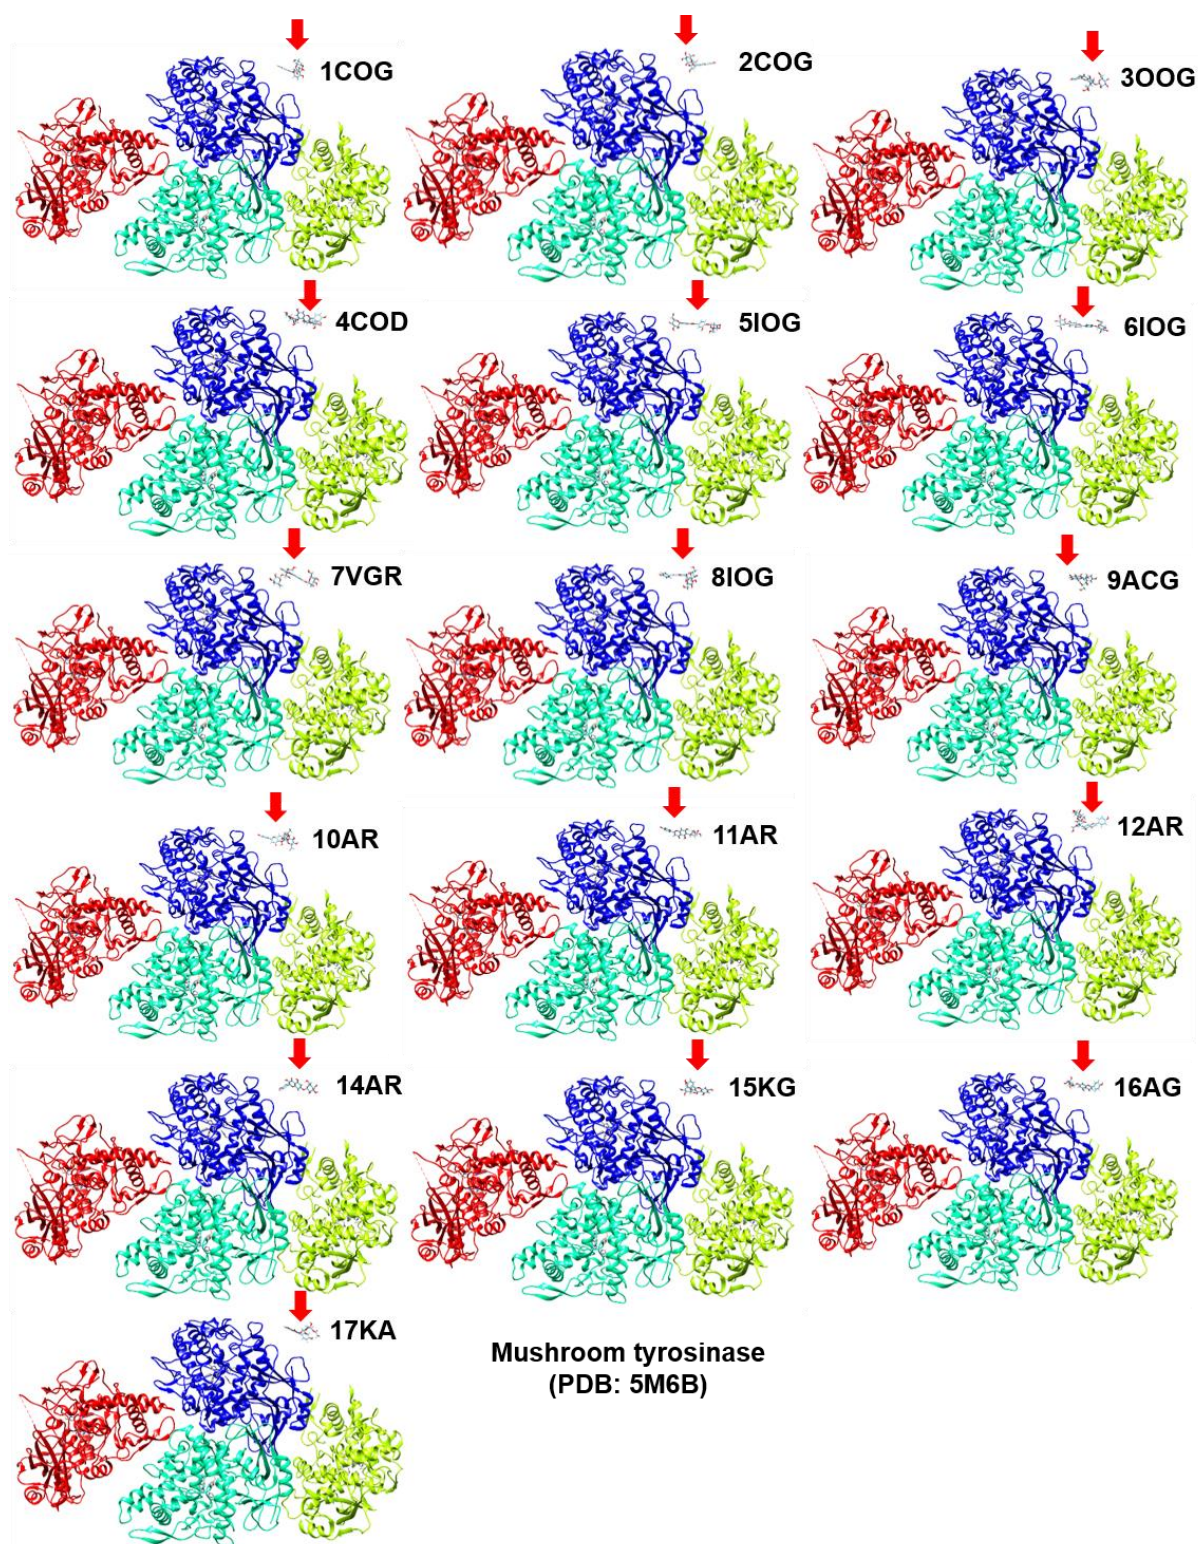

**Figure S4.** Molecular docking of mushroom tyrosinase (PDB: 5M6B) and anthocyanins confirmed in PS and PTS. Anthocyanins do not directly bind to mushroom.

**Table S1.** Classification of results gained from the docking of anthocyanins identified in this study into DUSP7.

| Receptor                           | Anthocyanins                                               | Docking score* |
|------------------------------------|------------------------------------------------------------|----------------|
| DUSP7<br>(2Y2E)                    | Cyanidin-3- <i>O</i> -galactoside                          | -6.2           |
|                                    | Cyanidin-3- <i>O</i> -glucoside                            | -6.8           |
|                                    | Orientin-7- <i>O</i> -glucoside                            | -5.7           |
|                                    | Cyanidin-3,5- <i>O</i> -diglucoside                        | -6.3           |
|                                    | Isoorientin-4'- <i>O</i> -glucoside                        | -6.8           |
|                                    | Isovitexin-4'- <i>O</i> -glucoside                         | -6.7           |
|                                    | Vitexin-4'- <i>O</i> -glucoside-2''- <i>O</i> -rhamnoside  | -7.3           |
|                                    | Isovitexin-7- <i>O</i> -glucoside (saponarin)              | -5.5           |
|                                    | Apigenin-8-C- $\beta$ -D-glucopyranoside (Vitexin)         | -6.0           |
|                                    | Isovitexin-2''- <i>O</i> -rhamnoside                       | -6.2           |
|                                    | Apigenin-6-C- $\beta$ -D-glucopyranoside (Isovitexin)      | -6.0           |
|                                    | Apigenin-6-C-glucoside-7-(6''- <i>O</i> -acetyl)-glucoside | -7.2           |
|                                    | Kaempferol- <i>O</i> -glucoside derivative                 | **             |
|                                    | Kaempferol-7- <i>O</i> -glucoside                          | -7.3           |
|                                    | Kaempferol-3- <i>O</i> -glucoside                          | -5.8           |
|                                    | Apigenin-7- <i>O</i> -glucoside                            | -7.4           |
| Kaempferol-3-(6''-acetylglucoside) | -6.6                                                       |                |

\*, Docking score are highest one from 4 different docking pose.

\*\*, Chemical structure was not found from PubChem CID.
